# Supplementary material
Source: publisher figshare collection journal article supplement (https://acs.figshare.com/ndownloader/files/7725199)
Supplement: Supplementary file 1 [file 7725199]

# ***In Vivo* Multiscale and Spatially-Dependent Biomechanics Reveals Differential Strain Transfer Hierarchy in Skeletal Muscle**

Soham Ghosh<sup>1</sup>, James G. Cimino<sup>2</sup>, Adrienne K. Scott<sup>1</sup>, Frederick W. Damen<sup>2</sup>, Evan H. Phillips<sup>2</sup>, Alexander I. Veress<sup>3</sup>, Corey P. Neu<sup>1,2,\*</sup>, Craig J. Goergen<sup>2,\*</sup>

<sup>1</sup>Department of Mechanical Engineering, University of Colorado Boulder, 1111 Engineering Drive, UCB 427, Boulder, Colorado 80309, United States

<sup>2</sup>Weldon School of Biomedical Engineering, Purdue University, 206 S Martin Jischke Drive, West Lafayette, Indiana 47907, United States

<sup>3</sup>Department of Mechanical Engineering, University of Washington, 352600 Stevens Way, Seattle, Washington 98195, United States

\*Corresponding authors

Corey P. Neu, Phone: 303.492.7330, E-mail: [cpneu@colorado.edu](mailto:cpneu@colorado.edu)

Craig J. Goergen, Phone: 765.494.1517, E-mail: [cgoergen@purdue.edu](mailto:cgoergen@purdue.edu)

**Supplementary movie 1.** Axial section view of mouse hind limb imaged using ultrasound. Undeformed (without stimulation) and deformed (with stimulation).

**Supplementary movie 2.** Coronal section view of mouse hind limb imaged using ultrasound. Undeformed (without stimulation) and deformed (with stimulation).

**Supplementary movie 3.** Coronal plane view of a part of the tibialis anterior muscle. The white elongated dots are the nuclei. Imaged using optical microscopy (10X). Undeformed (without stimulation) and deformed (with stimulation).

**Supplementary movie 4.** High magnification (40X) Coronal plane view of a nucleus in the tibialis anterior muscle. Imaged using optical microscopy. Undeformed (without stimulation) and deformed (with stimulation).
